# Supplementary material for: Synthesis of SnO2pillared carbon using long chain alkylamine grafted graphene oxide: an efficient anode material for lithium ion batteries
Source: Royal Society of Chemistry journal article supplement (doi:10.1039/c5nr06680h), 2015-11-16
Supplement: c5nr06680h1.pdf [file c5nr06680h1.pdf]

## Supporting Information

### Synthesis of SnO<sub>2</sub> pillared carbon using long chain alkylamine grafted graphene oxide: An efficient anode material for Lithium ion batteries.

M. Jeevan Kumar Reddy, Sung Hun Ryu and A. M. Shanmugharaj\*

Department of Chemical Engineering, Kyung Hee University,

Yongin-si, Gyeonggi-do 446-701, Republic of Korea

([shanmughar@gmail.com](mailto:shanmughar@gmail.com))

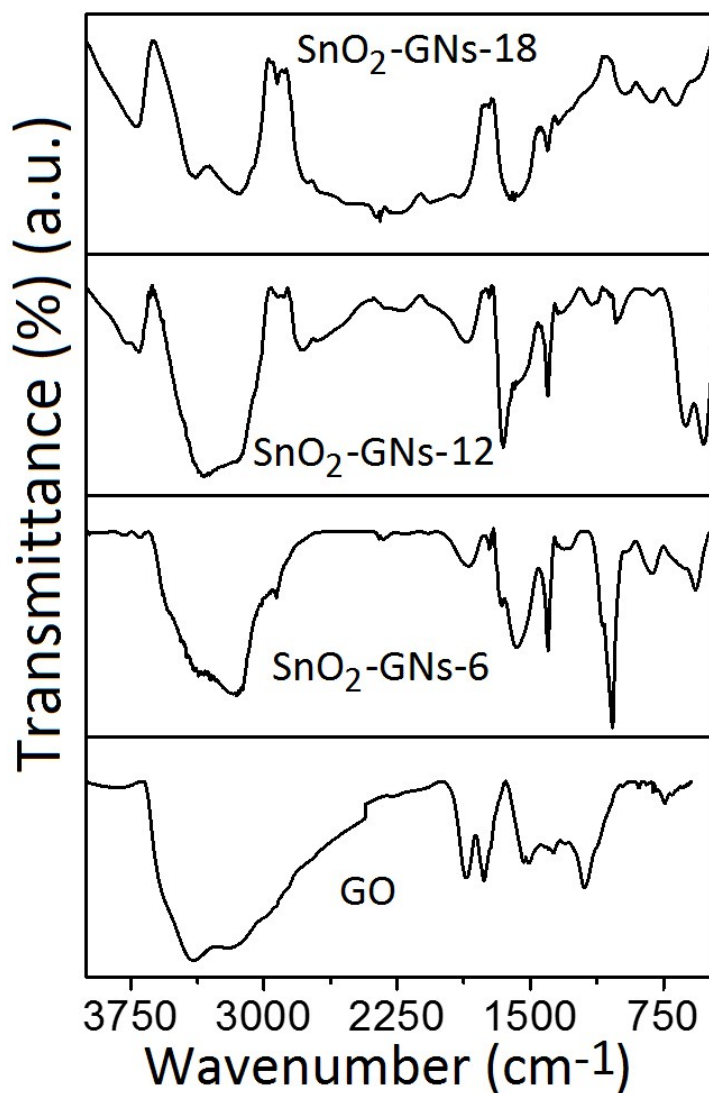

Fig. S1 FT-IR spectra of GO and SnO<sub>2</sub> pillared carbon

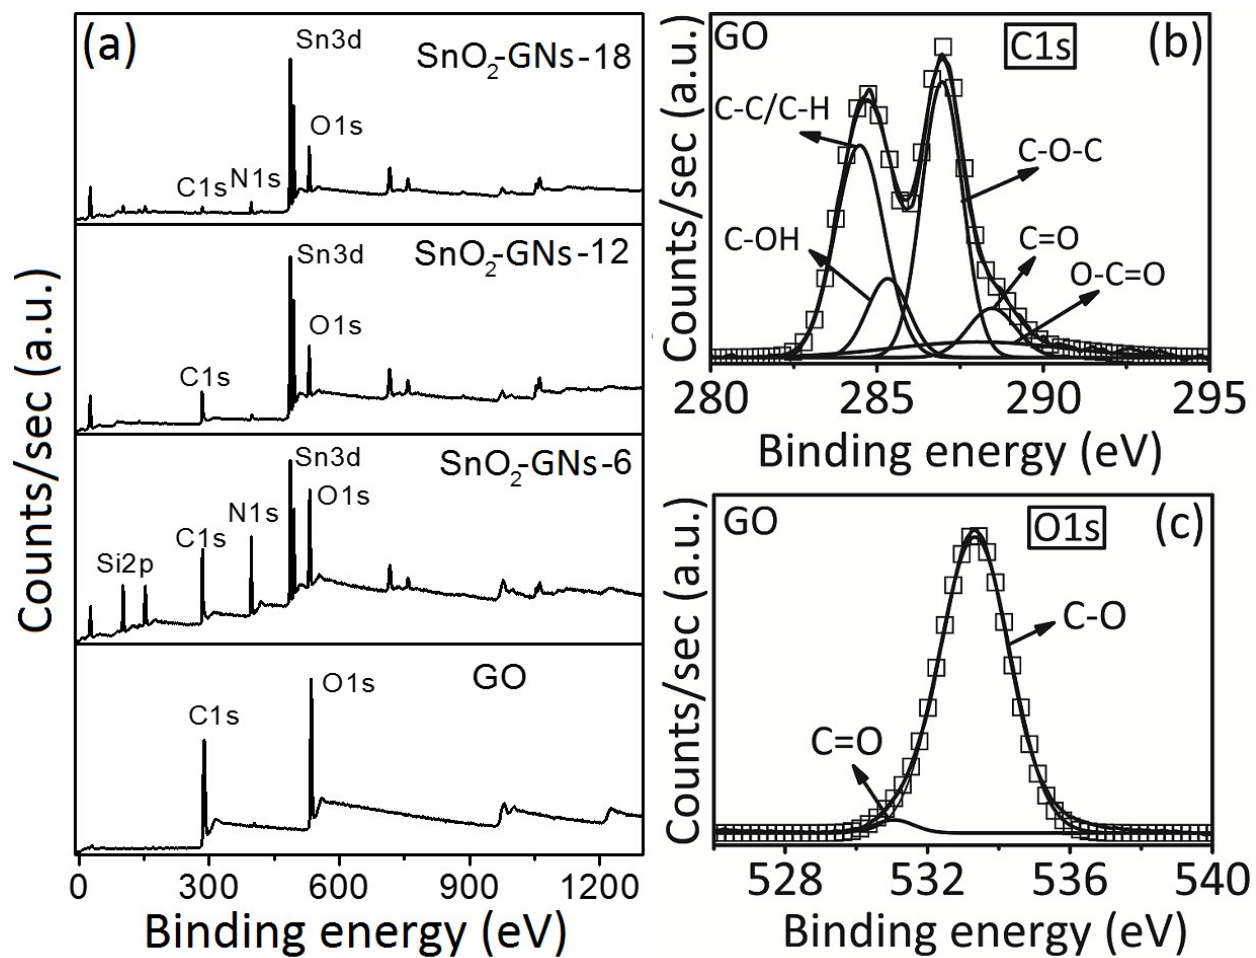

Fig. S2 XPS survey scan results of GO and SnO<sub>2</sub> pillared carbon (a) and high resolution C1s (b) and O1s spectra (c) of GO

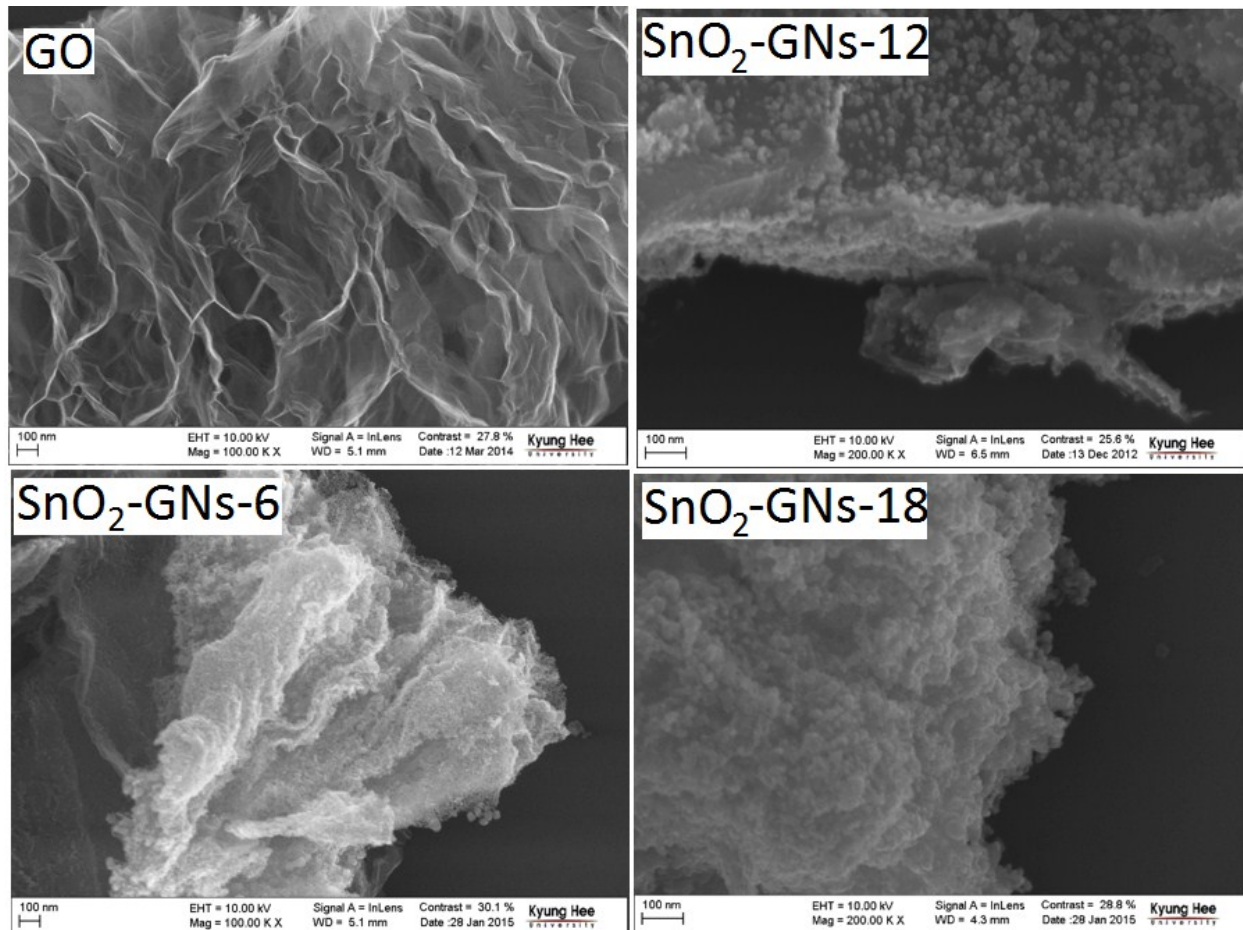

Fig. S3 FE-SEM images of GO and SnO<sub>2</sub> pillared carbon

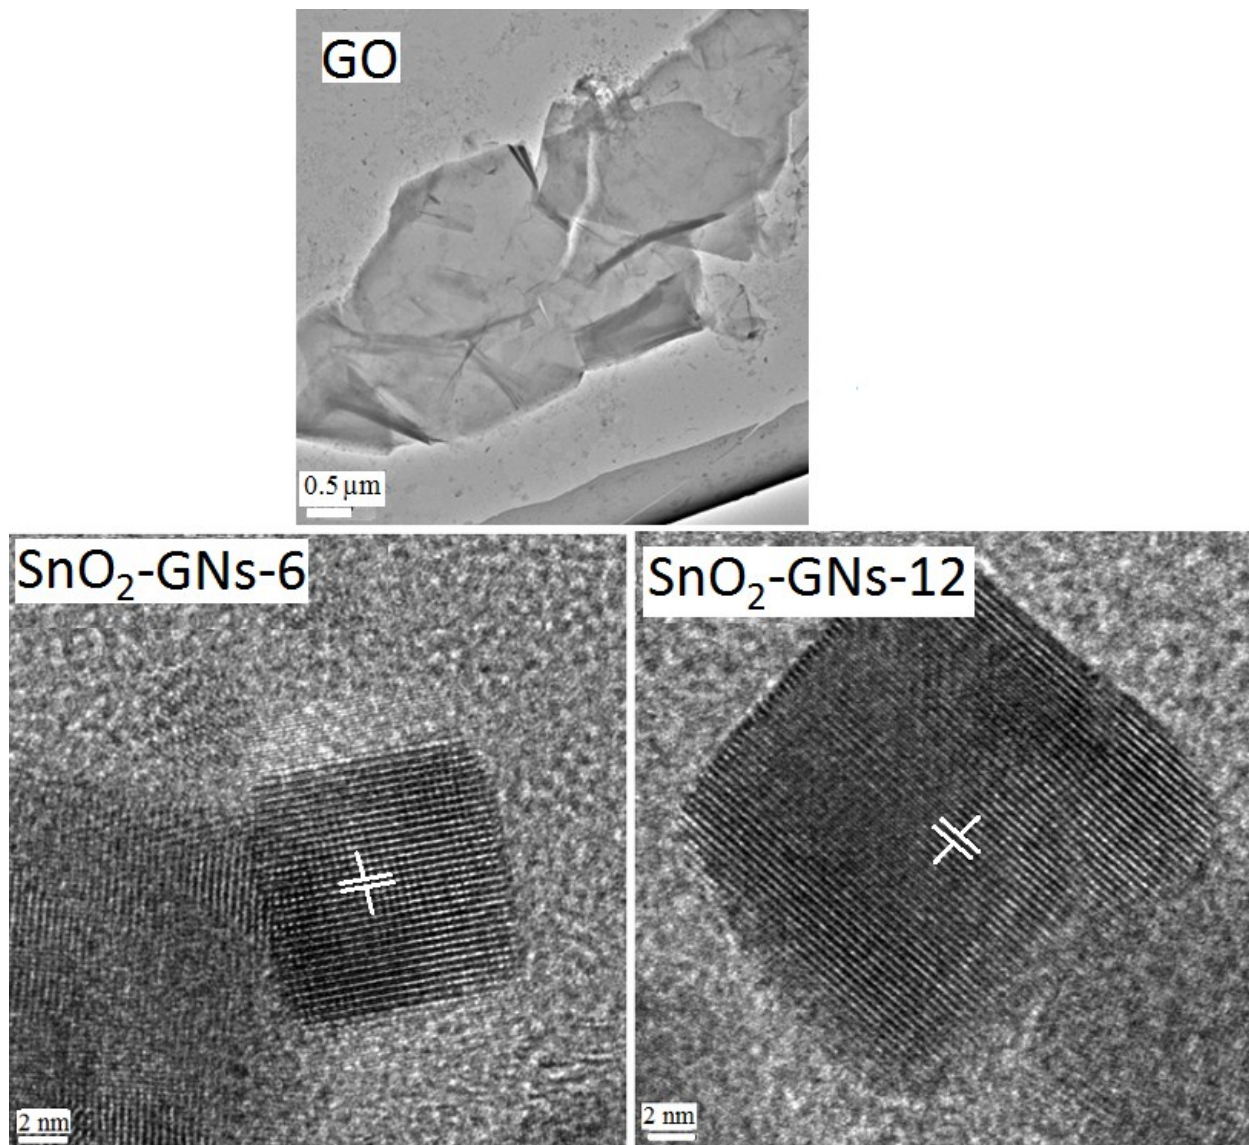

Fig. S4 TEM images of pristine GO and lattice images of SnO<sub>2</sub> crystals

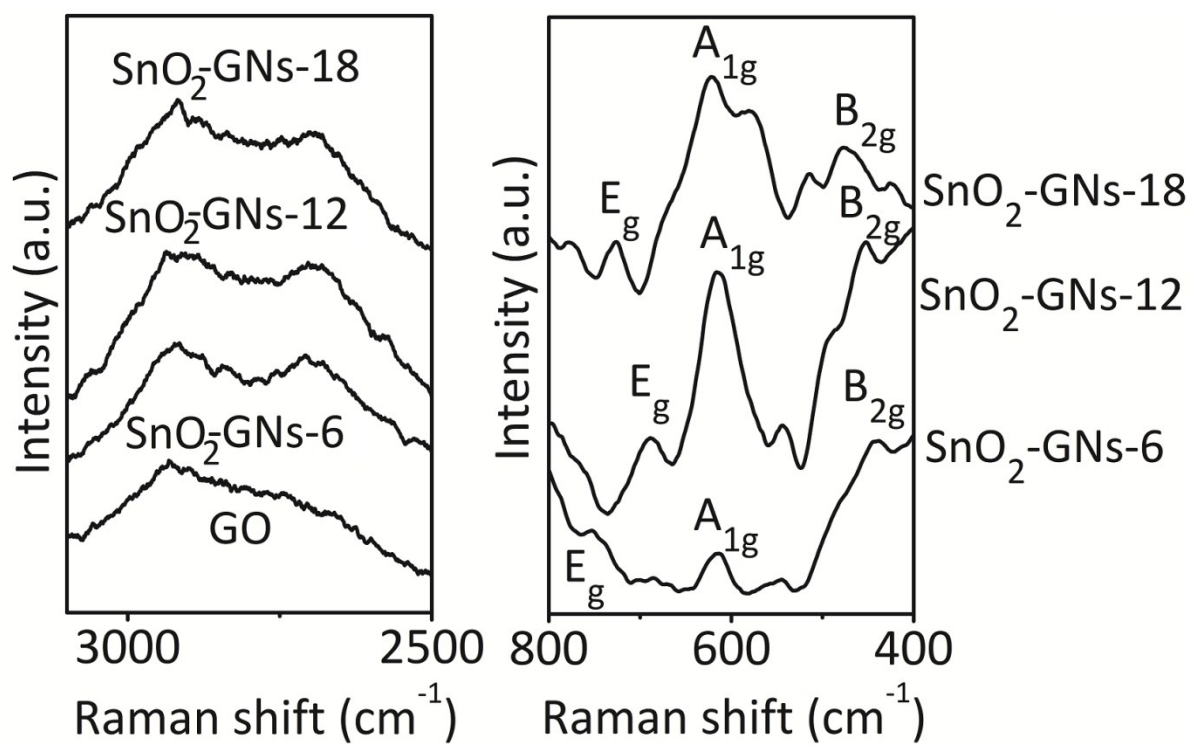

Fig. S5 Raman spectroscopic results of GO and SnO<sub>2</sub> pillared carbon at selected ranges

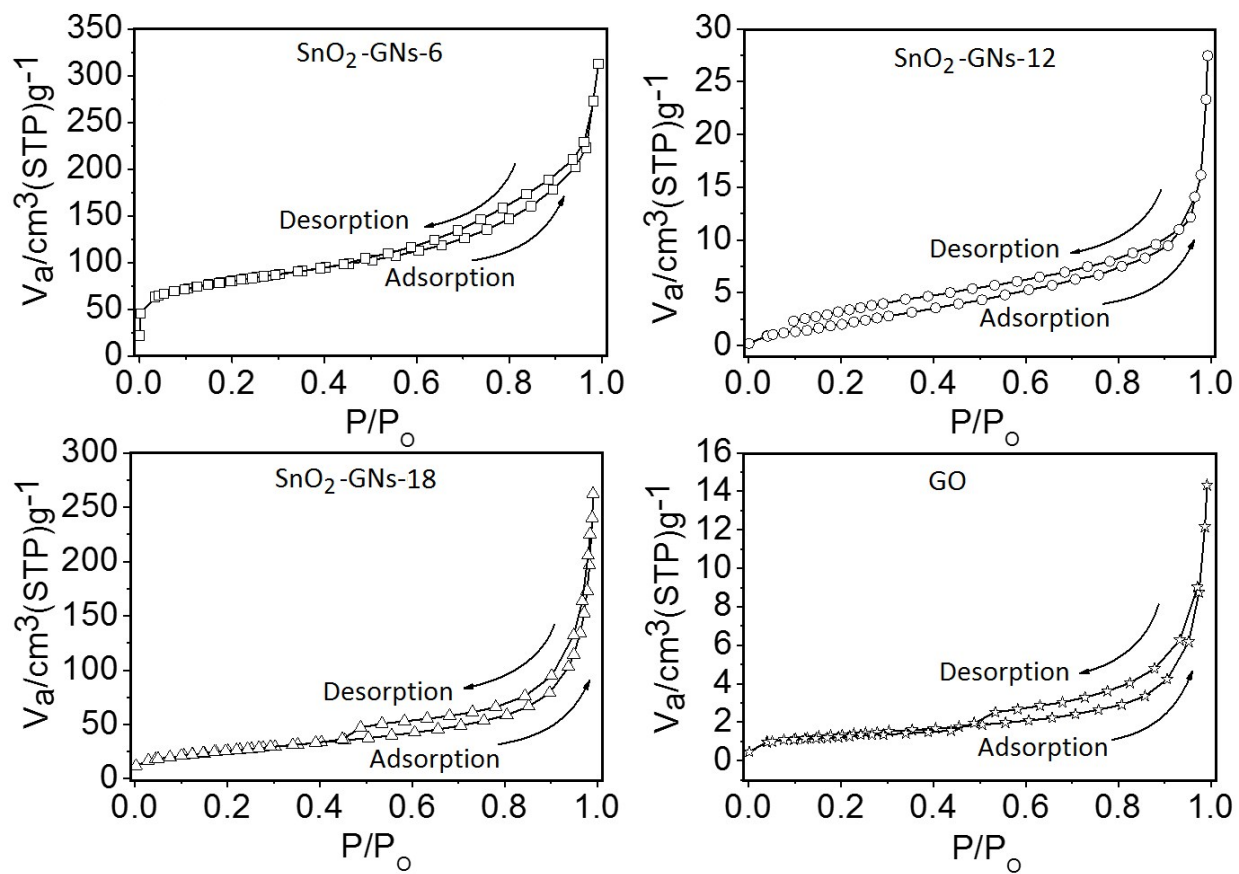

Fig. S6 BET N<sub>2</sub> adsorption-desorption curves of GO and SnO<sub>2</sub> pillared carbons

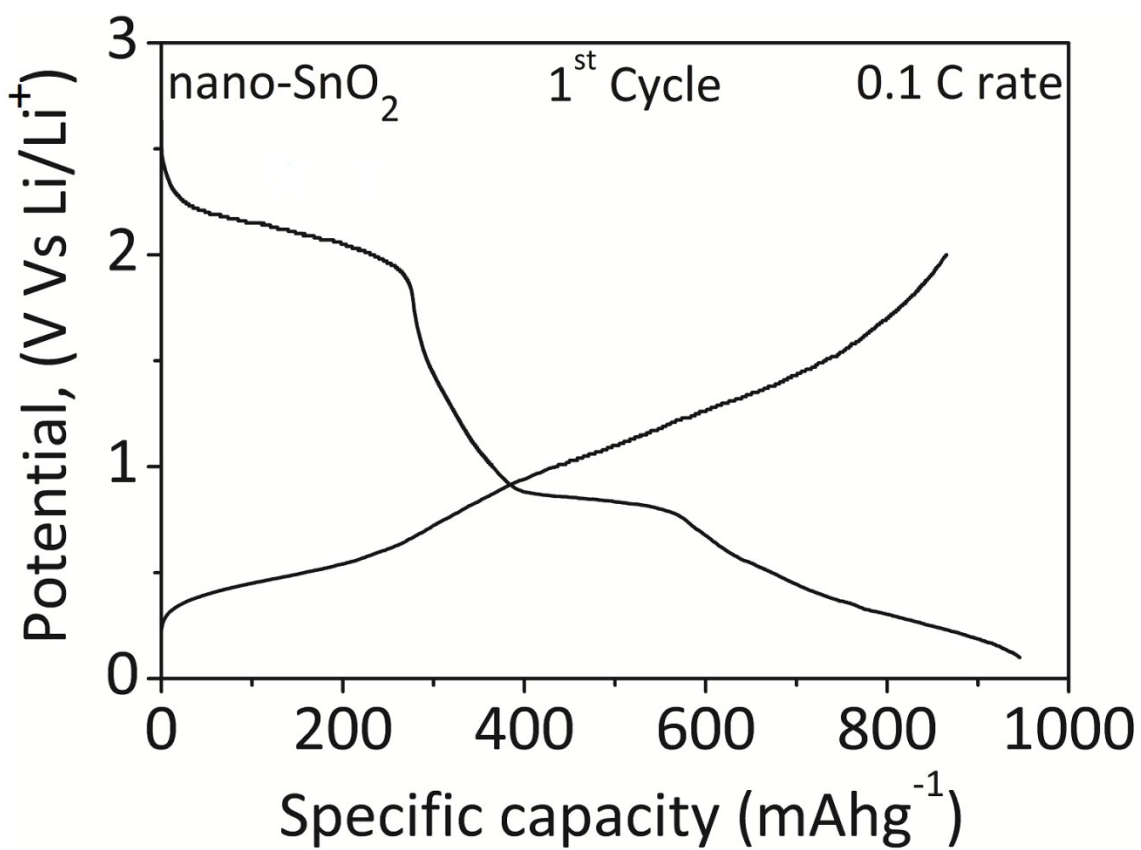

Fig. S7 Electrochemical charge-discharge profile for 1<sup>st</sup> cycle of nano-SnO<sub>2</sub> based electrodes

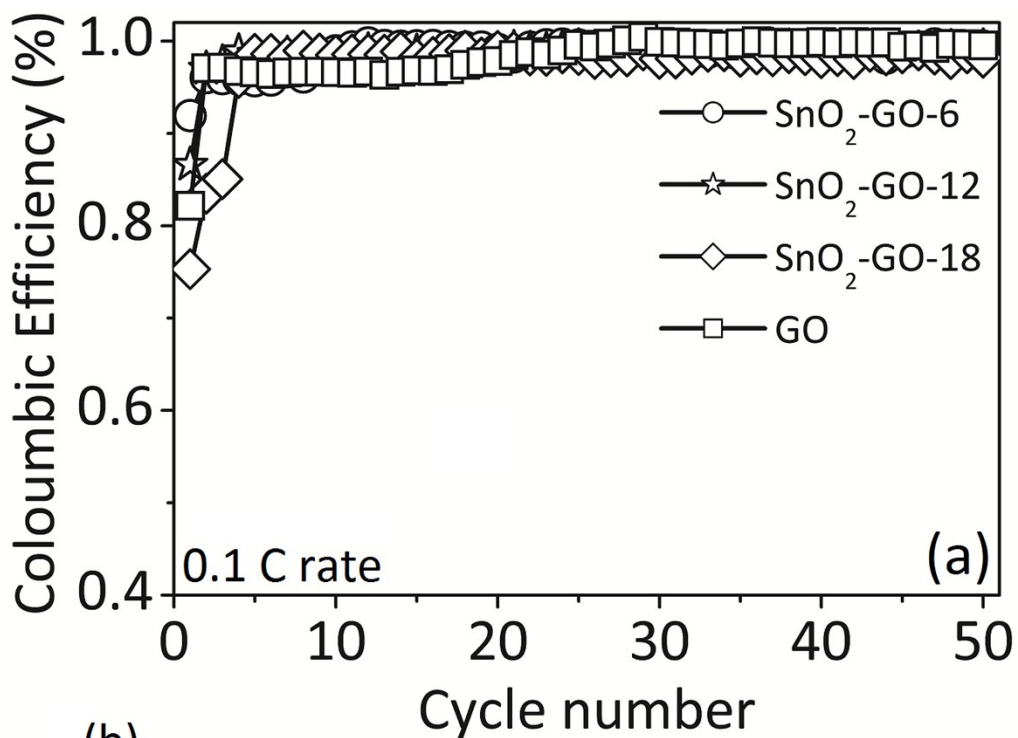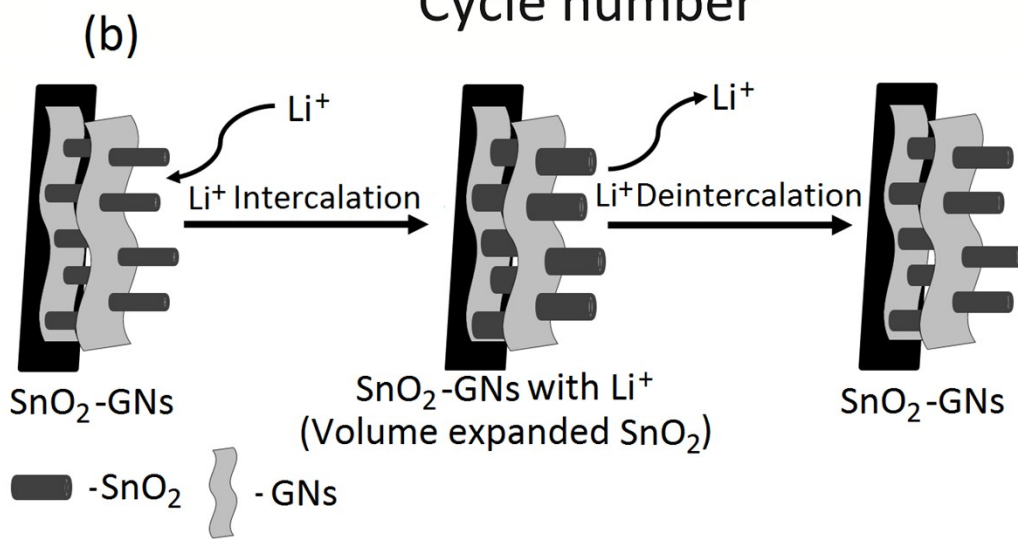

Fig. S8 (a) Variation of coulombic efficiency with cycle number of GO and SnO<sub>2</sub> pillared carbon (b) Possible mechanism of lithium-ion intercalation and deintercalation process in SnO<sub>2</sub> pillared carbon



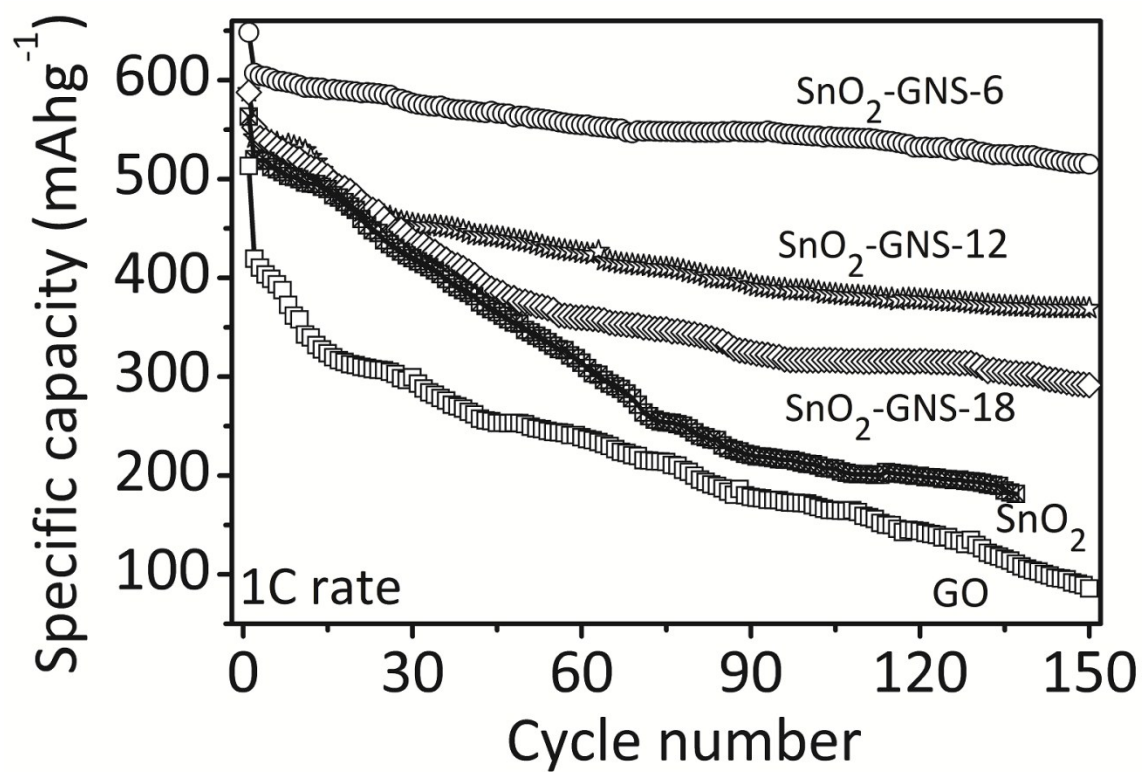

Fig. S9 Cyclic performance of GO, SnO<sub>2</sub> pillared carbon (SnO<sub>2</sub>-GNS-6; SnO<sub>2</sub>-GNS-12; SnO<sub>2</sub>-GNS-18) and nano-SnO<sub>2</sub> based electrodes

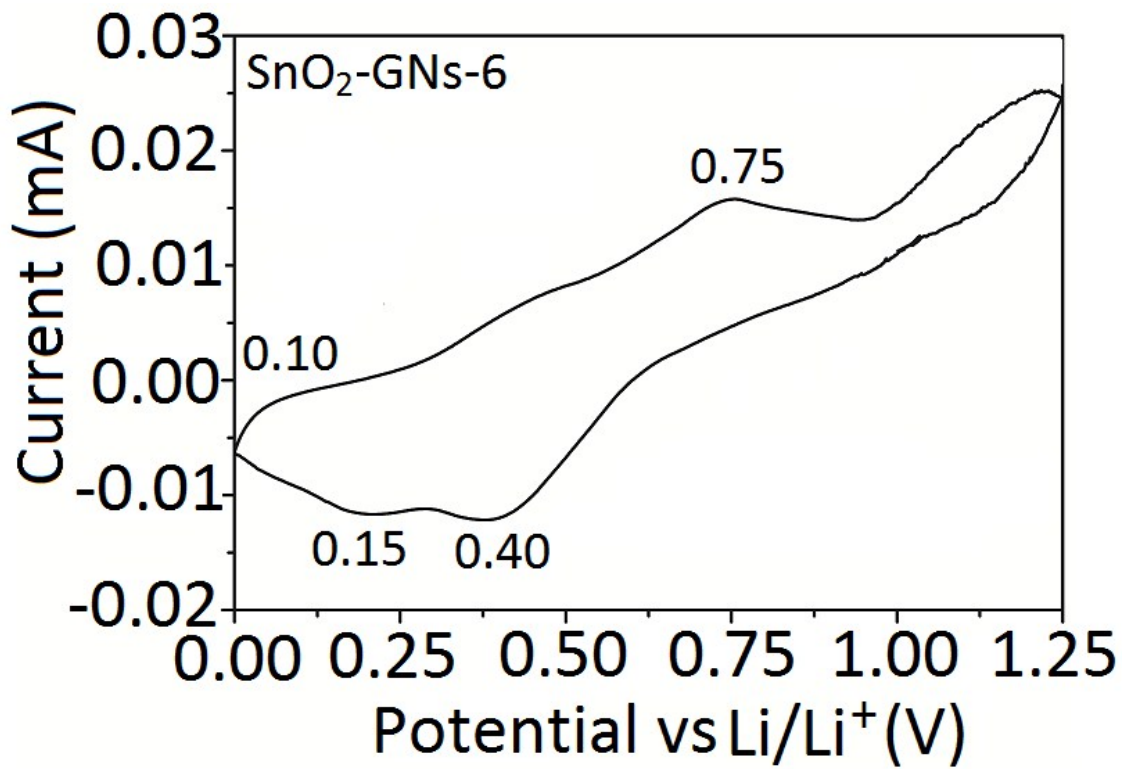

Fig. S10 Cyclic voltammetry results of representative SnO<sub>2</sub>-GNs-6

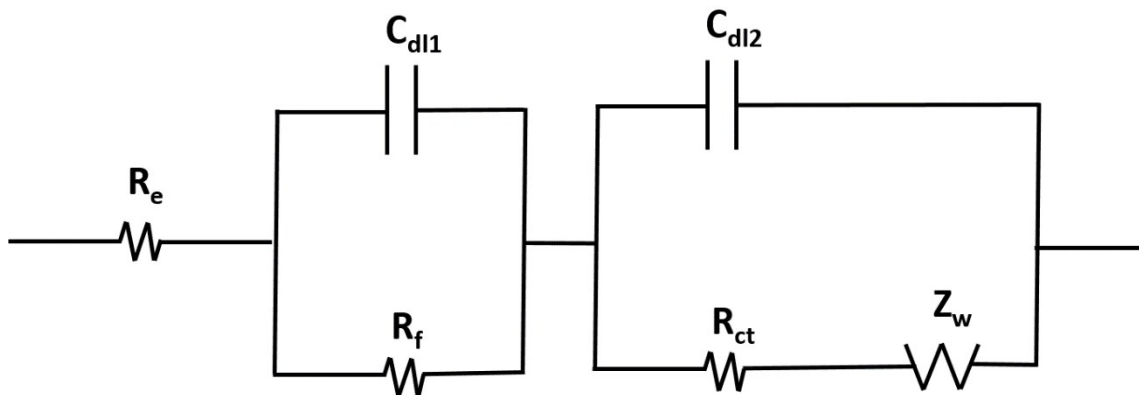

Fig. S11 Model used to calculate various resistance values using EIS data.
